# Supplementary material for: Diversity of microbes colonizing forages of varying lignocellulose properties in the sheep rumen
Source: PeerJ. 2021 Jan 11;9:e10463. doi: 10.7717/peerj.10463 (PMC7808268; doi:10.7717/peerj.10463)
Supplement: Supplemental Information 10 — DM; dry matter, NDF; neutral detergent fiber, ADF; acid detergent fiber, ADL; acid detergent lignin. Statistically significant differences were determined using one-way ANOVA. Means were compared using Duncan post-hoc test. Different means were denoted using letters at each time point at p < 0.05. AP, camelthorn, CR, common reed; DP, date palm; KS, Kochia; RS, rice straw; and SC, Salicornia. [file peerj-09-10463-s010.docx]

Table S2:
*In sacco* disappearance of chemical composition measured on the six experimental forages.

| Time | Feeds | DM | NDF | ADF | ADL | Cellulose | Hemicellulose |
| --- | --- | --- | --- | --- | --- | --- | --- |
| 24 h after rumen incubation | AP | 30.47±2.40abc | 25.02±1.43b | 23.22±0.41a | 22.73±6.93a | 22.94±1.84a | 31.51±6.30abcd |
| CR | 26.20±0.93c | 28.46±0.49ab | 23.67±1.36a | 06.36±4.02b | 25.62±0.34a | 36.37±2.67abcd |
| DP | 32.54±1.26ab | 29.18±1.79ab | 23.52±3.70a | 27.66±1.83a | 22.36±4.66a | 39.05±3.50bc |
| KS | 33.84±1.92a | 31.00±2.26a | 22.15±2.74a | 26.42±4.35a | 19.80±3.39a | 40.62±2.20ab |
|  | RS | 20.17±0.91d | 16.73±1.38c | 09.85±2.34b | 09.09±3.00b | 10.80±2.00b | 27.12±2.05d |
|  | SC | 28.77±0.82bc | 27.05±1.15ab | 24.82±3.64a | 5.87±3.65a | 26.18±1.45a | 29.73±2.90cd |
| 48 h after rumen incubation | AP | 40.05±4.21a | 32.39±3.21ab | 26.31±3.25ab | 23.58±2.52cde | 28.69±1.27a | 43.92±1.60ab |
| CR | 28.85±5.08cd | 30.04±6.97ab | 26.91±7.89ab | 07.89±4.87b | 28.56±9.89a | 40.18±4.01abc |
| DP | 41.28±3.13a | 36.29±2.21a | 30.79±0.06a | 37.87±6.95a | 28.76±2.01a | 45.93±5.80a |
| KS | 39.40±1.69ac | 32.86±2.01ab | 24.62±5.08ab | 31.08±5.54ac | 24.25±6.85a | 43.66±3.02ab |
|  | RS | 26.28±3.23d | 23.38±2.50b | 17.43±1.94b | 13.64±2.65eb | 18.31±4.58a | 31.26±2.00cd |
|  | SC | 32.94±2.95acd | 29.23±3.09ab | 29.26±2.94ab | 13.78±3.21bd | 28.07±2.31a | 33.62±4.85bd |
| 72 h after rumen incubation | AP | 44.17±4.11a | 33.41±4.07a | 30.22±2.99a | 27.07±4.27 bc | 32.01±3.41ab | 54.17±4.11a |
| CR | 42.30±3.54ab | 33.10±1.09a | 29.89±4.24a | 13.02±6.93 b | 30.85±1.83ab | 42.30±3.54bd |
| DP | 46.71±2.42a | 38.80±1.84a | 34.29±2.97a | 47.16±4.88 a | 30.59±2.59ab | 46.71±2.42ab |
| KS | 45.00±3.98a | 33.73±3.51a | 27.15±4.07a | 33.81±6.93 ac | 26.36±3.95ab | 49.00±3.98ab |
|  | RS | 31.88±1.84bc | 25.57±9.14a | 21.17±8.31a | 18.18±1.00 b | 23.07±3.00b | 33.88±1.84d |
|  | SC | 35.15±3.79ac | 31.02±4.50a | 31.28±4.49a | 14.08±3.18 b | 32.97±5.47a | 35.15±3.79d |
| 96 h after rumen incubation | AP | 43.97±0.93ab | 36.50±3.12ab | 30.48±4.82a | 28.19±7.49bd | 32.36±2.45a | 59.02±3.75a |
| CR | 35.34±1.90ab | 35.06±2.13ab | 32.21±2.53a | 14.25±4.13b | 31.16±3.29a | 42.81±1.97bc |
| DP | 44.34±2.32ab | 40.48±4.17a | 36.85±3.61a | 48.99±2.75a | 33.35±4.33a | 46.88±5.13abc |
| KS | 45.43±1.30a | 39.45±0.86ab | 29.52±0.83a | 35.53±4.94ad | 28.30±0.86a | 54.46±1.53ab |
|  | RS | 32.13±2.44b | 30.50±0.92b | 24.75±2.42a | 18.18±2.65b | 28.61±3.61a | 36.10±2.69c |
|  | SC | 39.88±9.49ab | 34.06±5.68ab | 34.82±0.55a | 16.50±4.60b | 35.20±6.75a | 37.24±9.56c |

DM; dry matter, NDF; neutral detergent fiber, ADF; acid detergent fiber, ADL; acid detergent lignin. Statistically significant differences were determined using one-way ANOVA. Means were compared using Duncan post-hoc test. Different means were denoted using letters at each time point at p < 0.05. AP; camelthorn, CR; common reed, DP; date palm, KS; Kochia, RS; rice straw, and SC; Salicornia.
