# Supplementary material for: Diversity of microbes colonizing forages of varying lignocellulose properties in the sheep rumen
Source: PeerJ. 2021 Jan 11;9:e10463. doi: 10.7717/peerj.10463 (PMC7808268; doi:10.7717/peerj.10463)
Supplement: Supplemental Information 12 — p = a + b (1 –exp−ct) where, p; is rumen disappearance at time t (h), a; washing losses, soluble or rapidly degradable fraction constant, b; slowly degradable fraction constant, c; degradation rate, t; time of incubation, ED; effective degradability was calculated as a + (b × c)/(c + k) at three ruminal passage rates (k = 0.02, 0.04, and 0.06 h−1), PD; potential degradability calculated as a+b. Statistically significant differences were determined using one-way ANOVA. Means within row, were compared using Duncan post-hoc test. Different means were denoted using letters for each forage at Bonferroni corrected p < 0.05. AP, camelthorn, CR, common reed, DP, date palm; KS, Kochia; RS, rice straw; and SC, Salicornia. DM; dry matter, NDF; neutral detergent fiber, ADF; acid detergent fiber, SEM; standard error of the mean. [file peerj-09-10463-s012.docx]

Table S4:

Degradation kinetics for chemical composition of the six experimental forages evaluated by the exponential model (Orskov and McDonald, 1979&).

| SEM | Forages | | | | | | Degradation kinetics | Forage |
| --- | --- | --- | --- | --- | --- | --- | --- | --- |
| **SC** | **RS** | **KS** | **DP** | **CR** | **AP** |
|  |  |  |  |  |  |
| 2.616 | 23.54b | 2.00d | 29.08a | 2.78d | 15.10c | 3.61d | a | **DM** |
| 2.202 | 33.61ab | 29.34ab | 32.03ab | 43.72a | 22.74b | 41.54ab | b |
| 3.219 | 57.15ab | 31.34b | 61.11a | 46.50ab | 37.85ab | 45.15ab | PD |
| 0.007 | 0.007b | 0.078d | 0.007b | 0.054ad | 0.010b | 0.043a | c |
| 2.031 | 32.20ab | 16.00b | 37.50a | 32.70ab | 27.90ab | 32.00ab | ED2 |
| 2.106 | 28.50b | 9.10a | 33.90b | 25.90b | 25.80b | 25.20b | ED4 |
| 2.236 | 27.00b | 5.40a | 32.50b | 21.50b | 25.00b | 21.00b | ED6 |
|  |  |  |  |  |  |  |  | **NDF** |
| 1.955 | 24.30a | 7.62b | 24.17ad | 12.92bd | 25.86a | 10.22b | a |
| 2.392 | 49.60a | 25.19b | 33.06ab | 28.34b | 34.36ab | 26.65b | b |
| 4.095 | 73.89a | 32.80b | 57.23ab | 41.26b | 60.22ab | 36.87b | PD |
| 0.003 | 0.002c | 0.019b | 0.006c | 0.035a | 0.003c | 0.0342a | c |
| 1.515 | 29.40a | 19.90a | 32.30a | 31.10a | 30.60a | 27.00a | ED2 |
| 1.482 | 27.00a | 15.80a | 28.80a | 26.30a | 28.40a | 22.50a | ED4 |
| 1.518 | 26.10a | 13.70a | 27.40a | 23.50a | 27.60a | 19.90a | ED6 |
|  |  |  |  |  |  |  |  | **ADF** |
| 1.671 | 20.79d | 2.38c | 17.07ad | 10.88abc | 20.19ad | 16.86ad | a |
| 3.596 | 32.11acf | 49.46abc | 22.19f | 28.59df | 53.76ac | 16.50f | b |
| 3.807 | 52.89ab | 51.85ab | 39.26b | 39.47b | 73.95a | 33.36b | PD |
| 0.012 | 0.006d | 0.007d | 0.005d | 0.024a | 0.003d | 0.019a | c |
| 1.416 | 28.10a | 15.30a | 23.70a | 26.60a | 26.80a | 25.00a | ED2 |
| 1.470 | 24.90a | 9.80b | 21.00ab | 21.70ab | 23.70a | 22.30ab | ED4 |
| 1.503 | 23.60a | 7.60b | 19.80a | 19.20ab | 22.60a | 20.90a | ED6 |

*&*p = a + b (1 – exp-ct) where, p; is rumen disappearance at time t (h), a; washing losses, soluble or rapidly degradable fraction constant, b; slowly degradable fraction constant, c; degradation rate, t; time of incubation, ED; effective degradability was calculated as a + (b × c)/(c + k) at three ruminal passage rates (k= 0.02, 0.04, and 0.06 h-1), PD; potential degradability calculated as a+b. Statistically significant differences were determined using one-way ANOVA. Means within row, were compared using Duncan post-hoc test. Different means were denoted using letters for each forage at Bonferroni corrected p < 0.05. AP; camelthorn, CR; common reed, DP; date palm, KS; Kochia, RS; rice straw, and SC; Salicornia. DM; dry matter, NDF; neutral detergent fiber, ADF; acid detergent fiber, SEM; standard error of the mean.
